# Supplementary material for: Ionic liquid-assisted exfoliation of graphite oxide for simultaneous reduction and functionalization to graphenes with improved properties
Source: Royal Society of Chemistry journal article supplement (doi:10.1039/c2ta00353h), 2012-12-11
Supplement: c2ta00353h.pdf [file c2ta00353h.pdf]

## Ionic Liquid-Assisted Exfoliation of Graphite Oxide for Simultaneous Reduction and Functionalization to Graphenes with Improved Properties

Yu Fu,<sup>1</sup> Jinwen Zhang,<sup>1\*</sup> Hang Liu,<sup>2</sup> William C. Hiscox,<sup>3</sup> Yi Gu,<sup>4</sup>

<sup>1</sup>School of Mechanical and Materials Engineering & Composite Materials and Engineering Center,

<sup>2</sup>Department of Apparel, Merchandising, Designs and Textiles

<sup>3</sup>Nuclear Magnetic Resonance Center,

<sup>4</sup>Department of Physics and Astronomy,

Washington State University, Pullman, Washington 99164

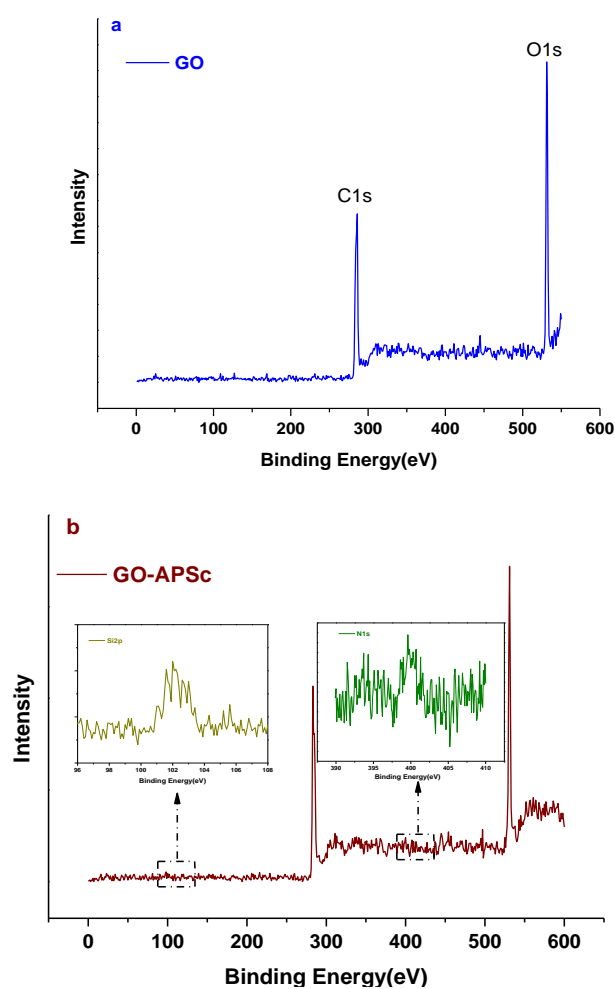

Fig. S1 The surface survey of (a) GO and (b) GO-APSc

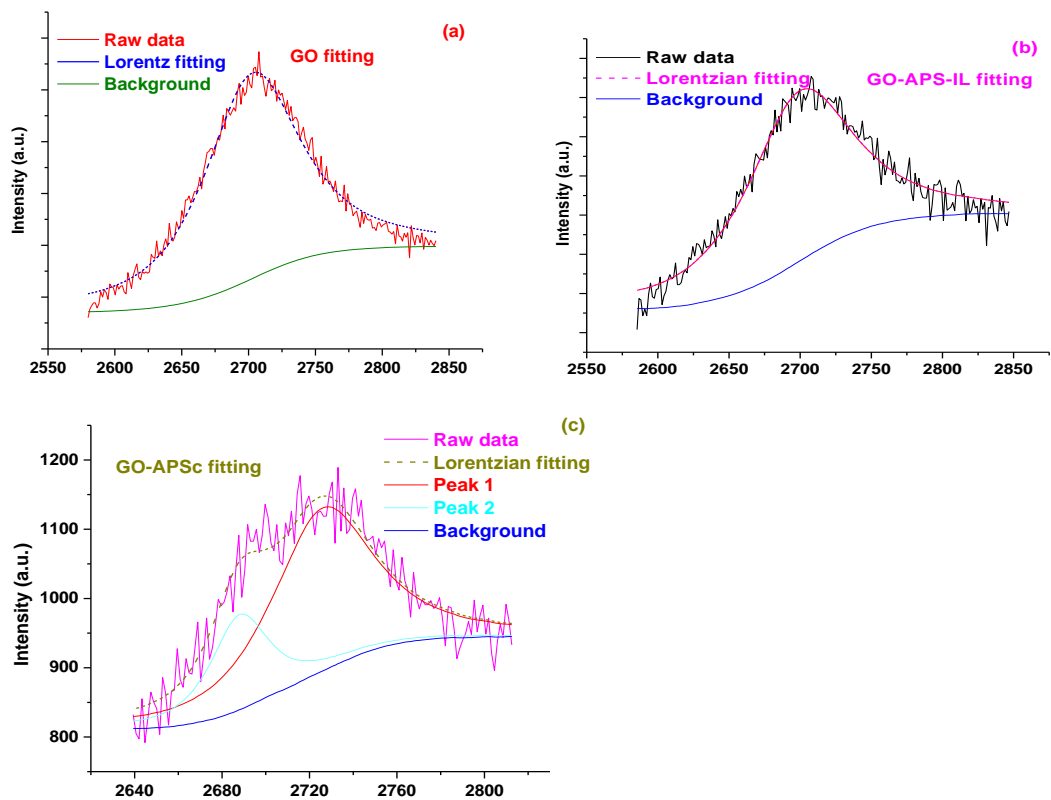

Fig. S2 The deconvolution of the 2D bands ((a)-GO; (b)-GO-APS-IL; (c)-GO-APSc)

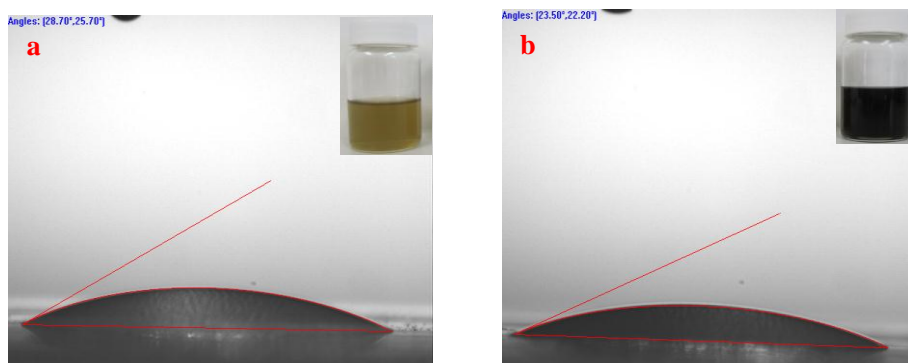

Fig. S3 Wet-out on the PLA substrate ((a) and (b) insets Go and GO-APS-IL in the THF solution (0.2 mg/mL), respectively)

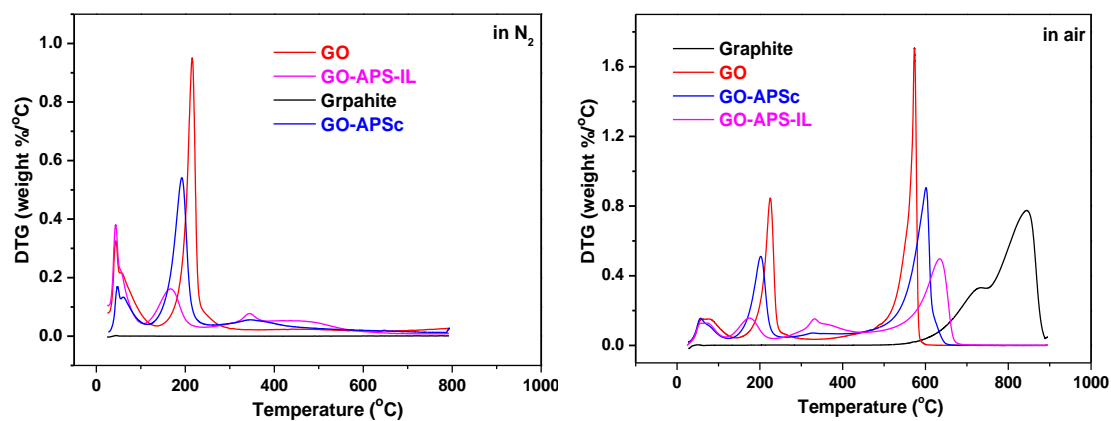

Fig. S4 DTG curves of pristine graphite, GO, GO-APSc, and GO-APS-IL in N<sub>2</sub> and air environment

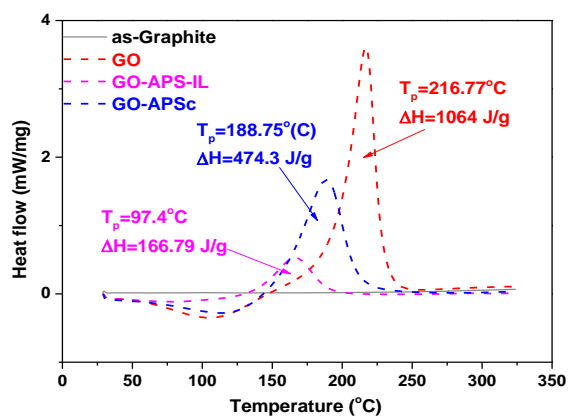

Fig. S5 DSC curves of pristine graphite, GO, GO-APSc, and GO-APS-IL
